# Supplementary material for: Black sea cucumber ( Holothuria atra Jaeger, 1833) rescues Pseudomonas aeruginosa -infected Caenorhabditis elegans via reduction of pathogen virulence factors and enhancement of host immunity
Source: Royal Society of Chemistry journal article supplement (doi:10.1039/c9fo01357a), 2019-01-01
Supplement: c9fo01357a1.pdf [file c9fo01357a1.pdf]

1 **Table 1.** QTOF-LCMS analysis of *Holothuria atra* fraction F3 and the identification of  
2 aspidospermatidine and inosine. The obtained individual MS/MS fingerprinting spectrum  
3 was compared with with METLIN, MassBank and Chemspider databases.

4

| ESI-MS<br>RT (min) | Detected ion<br>( <i>m/z</i> ) [M-H]- | Fragments                                         | Molecular Formula                                             | Identification     |
|--------------------|---------------------------------------|---------------------------------------------------|---------------------------------------------------------------|--------------------|
| 17.764             | 266.1789                              | 266, 144,<br>136, 130                             | C <sub>18</sub> H <sub>22</sub> N <sub>2</sub>                | Aspidospermatidine |
| 18.395             | 268.194                               | 268, 215,<br>185, 136,<br>133, 109, 93,<br>82, 54 | C <sub>10</sub> H <sub>12</sub> N <sub>4</sub> O <sub>5</sub> | Inosine            |

5

6

7

8

9

10

11

12

13

14

15

16

17

18

19

20

21

22

23

24 **Supplementary 1**

25 The antimicrobial effect of *Holothuria atra* on *P. aeruginosa* PA14 as determined by Minimum  
26 Inhibitory Concentration (MIC) test\*.

| Samples                             | Concentration ( $\mu\text{g/mL}$ ) |    |     |     |      |
|-------------------------------------|------------------------------------|----|-----|-----|------|
|                                     | 25                                 | 50 | 100 | 500 | 1000 |
| <i>Holothuria atra</i> -methanol    | -                                  | -  | -   | -   | -    |
| <i>Holothuria atra</i> -fraction F3 | -                                  | -  | -   | -   | -    |
| Streptomycin**                      |                                    |    | +   |     |      |

27 \* + denotes inhibition; – denotes no inhibition of PA14 growth

28 \*\* 100  $\mu\text{g/ml}$  streptomycin was used as control

29

30 **Supplementary 2.**

31 QTOF-LCMS analysis of *Holothuria atra* fraction F3 and the identification of  
32 aspidospermatidine and inosine

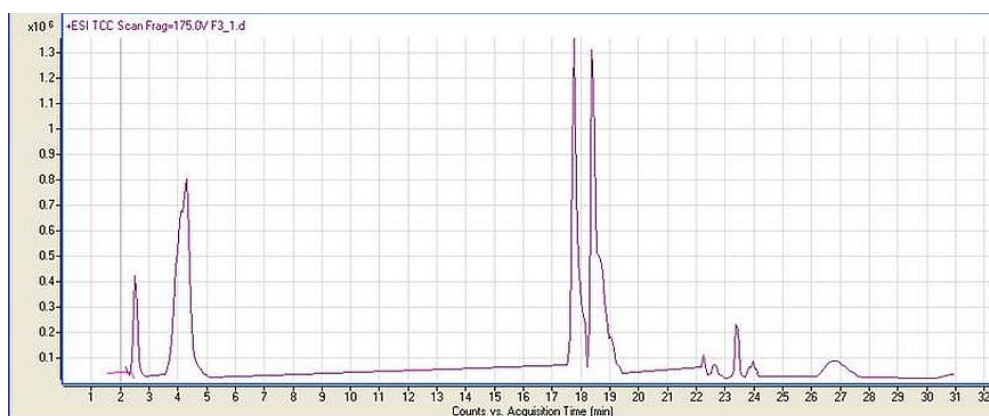

33
